# Supplementary material for: Systemic Risk Contagion in Reconstructed Financial Credit Network within Banking and Firm Sectors on DebtRank Based Model
Source: Hindawi journal article supplement (doi:10.1155/2020/8885657), 2020-12-10
Supplement: f1 [file 8885657.f1.docx]

**Supplementary Information**

Following is the main pseudocode in the article “***Systemic risk contagion in reconstructed financial credit network within banking and firm sectors on debtrank based model***”, which is focused on the main program part of the simulation process”, and can be illustrated for the main idea of the article. All the algorithm is conducted in the software platform of Matlab 2014.

**%%Main program of the simulation process**

function [C_equity] = Main()

clear

T=50; %time steps defined

M=100; %number of the banks defined

N=200; %number of the firms defined

n=20; %number of the shocked firms defined

mm=10; %number of the shocked banks defined

alpha1=0.28; %the setting of the initial banks’ other assets to the whole assets

alpha2=0.1; %the setting of the initial banks’ equity to the whole assets

alpha3=0.08; %the critical status of the occurrence of banks’ credit hoarding behavior

alpha4=0.1; % the setting of the initial firms’ equity to the whole assets

sita=0.3; % the setting of the initial firms’ liquidity assets to the whole assets

m=0.3; %the proportion of the shocked agents

q=0.95; %liquidity rate of the assets

%% shocked firms are selected randomly

DD=randperm(N,n); %n firms are randomly selected to be shocked

%% shocked banks are selected randomly

DD_bank=randperm(M,mm); %mm banks are randomly selected to be shocked

%% interbank network is constructed

[A1,BB] = bank_network(M,T);

%% bank-firm network is constructed

[BC] = bc_network(M,N,A1,T);

%% the whole assets and debts of the banks

B_B=zeros(T,M); % bank i’s interbank assets

B_C=zeros(T,M); % bank i’s bank-firm assets

B_total=zeros(T,M); % bank i’s whole assets

B_debt=zeros(T,M); % bank i’s interbank debts

B_equity=ones(T,M); %banks’ equity

hf=1;

hp=0;

while hf==1

for i=1:M

B_B(1,i)=sum(BB(i,1:M,1)); %bank I’s initial interbank assets

B_C(1,i)=sum(BC(1:N,i,1)); %bank I’s initial bank-firm assets

B_total(1,i)=(B_B(1,i)+B_C(1,i))/(1-alpha1); %bank i’s initial whole assets

B_debt(1,i)=sum(BB(1:M,i,1)); %bank I’s initial debt

B_equity(1,i)=B_total(1,i)*alpha2; %bank i’s initial equity

if B_total(1,i)<B_debt(1,i)+B_equity(1,i)

disp('asset allocation should be reasonable')

hp=1;

break;

end

end

if hp==1

[A1,BB] = bank_network(M,T);

[BC] = bc_network(M,N,A1,T);

hf=1;

else

hf=2;

disp('asset allocation is reasonable')

end

end

%% banks’ whole assets and debts

C_L=zeros(T,N); %bank I’s liquidity asset

C_N=zeros(T,N); %bank I’s illiquidity asset

C_total=zeros(T,N); %bank i’s whole asset

C_dan=zeros(T,N); %bank i’s whole assets by inter-firm guarantee

C_debt=zeros(T,N); %bank i’s debts between bank and firm

C_equity=ones(T,N); %bank i’s equity

% value endowment for each array

for i=1:N

C_dan(1,i)=sum(CC(i,1:N,1)); %bank I’s whole assets by inter-firm guarantee

C_debt(1,i)=sum(BC(i,1:M,1)); %bank I’s initial debt between bank and firm

C_total(1,i)=round(lognrnd(15.2,0.8)); % bank I’s initial whole assets

while C_total(1,i)<C_debt(1,i)+C_total(1,i)*alpha4 && C_total(1,i)<C_dan(1,i)+C_total(1,i)*sita

C_total(1,i)=round(lognrnd(15.2,0.8)); %There are two conditions for the program should be satisfied. First, each bank’s whole assets should be more than the sum of debts and the equity between the bank and the firm; Second, each bank I’s whole assets should be more than the liquidity assets and the assets by guarantee between firms.

end

C_L(1,i)=C_total(1,i)*sita; %bank I’s initial liquidity assets

C_N(1,i)=C_total(1,i)*(1-sita); % bank I’s initial illiquidity assets

C_equity(1,i)=C_total(1,i)*alpha4; % bank I’s initial equity

End

%% initial status of the agents can be endowed with three categories (“1” represents “not shocked”; “0” represents “shocked but safe”; “-1” represents “bankrupt”)

B_node=ones(T,M); %for banks

C_node=ones(T,N); %for firms

%% the proportion of the agents with different status

B_U=ones(T,1); % the proportion of banks with status “U”

B_S=zeros(T,1); % the proportion of banks with status “S”

B_DD=zeros(T,1); % the proportion of banks with status “D”

C_U=ones(T,1); % the proportion of firms with status “U”

C_S=zeros(T,1); % the proportion of firms with status “S”

C_DD=zeros(T,1); % the proportion of firms with status “D”

%% Basic program for the simulation

for t=2:T

%% for firms

for i=1:N

if t==2 %shocked first time

[C_equity,CC,BC] = first_shock(M,N,i,C_equity,C_L,DD,t,CC,BC,m);

else %risk contagion process

[C_equity,CC,BC] = company_shock(N,M,i,B_equity,C_equity,t,CC,BC,q);

end

if C_equity(t,i)<0

C_equity(t,i)=0;

end

%% firms’ status judged

if C_equity(t,i)<=0

C_node(t,i)=-1; %if the shocked firm’s equity is less than zero, it will come to the status of “-1”

end

if C_equity(t,i)>0&& C_equity(t,i)~=C_equity(1,i)

C_node(t,i)=0; %if the shocked firm’s equity is more than zero, it will come to the status of “0”

end

if C_equity(t,i)>0&&C_equity(t,i)==C_equity(1,i)

C_node(t,i)=1; %the status of the unshocked firms is still

end

end

%% firm’s status at time *t* is evaluated

c_u=0;

c_s=0;

c_dd=0;

for qq=1:N

if C_node(t,qq)==1

c_u=c_u+1;

end

if C_node(t,qq)==0

c_s=c_s+1;

end

if C_node(t,qq)==-1

c_dd=c_dd+1;

end

end

C_U(t,1)=c_u/N;

C_S(t,1)=c_s/N;

C_DD(t,1)=c_dd/N;

%% for banks

for i=1:M

if t==2

[B_equity,BB,BC] = first_bank(M,N,i,B_equity,B_total,DD_bank,t,BB,BC,m,alpha1);

else % risk contagion process

[B_equity,BB,BC] = bank_shock(N,M,i,B_equity,C_equity,t,BB,BC,alpha3,C_total);

end

if B_equity(t,i)<0

B_equity(t,i)=0;

end

%% banks’ status is evaluated

if B_equity(t,i)<=0

B_node(t,i)=-1; %if the shocked banks’ equity is less than zero, the status of them will come to “-1”

end

if B_equity(t,i)>0&& B_equity(t,i)~=B_equity(1,i)

B_node(t,i)=0; %if the shocked banks’ equity is larger than zero, shocked banks’ status comes to “0”

end

if B_equity(t,i)>0&&B_equity(t,i)==B_equity(1,i)

B_node(t,i)=1; % the unshocked banks’ status is still

end

end

%% the proportion of the banks’ status at time t is evaluated

b_u=0;

b_s=0;

b_dd=0;

for qq=1:M

if B_node(t,qq)==1

b_u=b_u+1;

end

if B_node(t,qq)==0

b_s=b_s+1;

end

if B_node(t,qq)==-1

b_dd=b_dd+1;

end

end

B_U(t,1)=b_u/M;

B_S(t,1)=b_s/M;

B_DD(t,1)=b_dd/M;

end

%% Plot for the simulation

%%

t=(0:T-1);

plot(t,B_U,'r',t,B_S,'b',t,B_DD,'y',t,C_U,'g',t,C_S,'m',t,C_DD,'k');

legend('the proportion of banks with status “U”', 'the proportion of banks with status “I”','the proportion of banks with status “D”','the proportion of firms with status “U”','the proportion of firms with status “I”','the proportion of firms with status “D”')

xlabel('time t')

ylabel('the proportion of the agents with different status')

axis([0 T-1 -0.1 1.1])

end

%% Bank shocked program

function [B_equity,BB,BC] = bank_shock(N,M,i,B_equity,C_equity,t,BB,BC,alpha3,C_total)

%% calculating the changes of the banks’ equity in the risk contagion process

if B_equity(t-2,i)<=0 %evaluating the bank I’s status after the last time step

for j=1:M

BB(i,j,t)=0;

BB(j,i,t)=0;

end

for k=1:N

BC(k,i,t)=0;

end

B_equity(t,i)=0;

else

%% evaluating whether there is firm’s shocked or not at the last time step

GG=0;

for k=1:N

if C_equity(t-2,k)>0

if C_equity(t-1,k)<alpha3*C_total

BC(k,i,t)=BC(k,i,t-1)*(C_equity(t-1,k)/C_equity(t-2,k));

else

BC(k,i,t)=BC(k,i,t-1);

end

else

BC(k,i,t)=0;

end

GG=GG+BC(k,i,t-1)-BC(k,i,t);

end

%% evaluating whether there is bank’s shocked or not at the last time setp

HH=0;

for j=1:M

if B_equity(t-2,j)>0

BB(i,j,t)=BB(i,j,t-1)*(B_equity(t-1,j)/B_equity(t-2,j));

else

BB(i,j,t)=0;

end

HH=HH+BB(i,j,t-1)-BB(i,j,t);

end

B_equity(t,i)=B_equity(t-1,i)-HH-GG;

end

end

%% Firm shocked program

function [C_equity,CC,BC] = company_shock(N,M,i,B_equity,C_equity,t,CC,BC,q)

%% calculating the changes of the banks’ equity in the risk contagion process

if C_equity(t-2,i)>0 %if the bank is still ok after the last time step

HH=0;

for j=1:M

if B_equity(t-1,j)<=0&&B_equity(t-2,j)>0

HH=HH+BC(i,j,t-1)/q; % firm’s fire-sale behavior for the loss

BC(i,j,t)=0;

end

if B_equity(t-1,j)>0

BC(i,j,t)=BC(i,j,t-1);

end

if B_equity(t-2,j)<=0

BC(i,j,t)=0;

end

end

%% evaluating whether there is firm’s shocked or not at the last time step

GG=0;

for k=1:N

if C_equity(t-2,k)>0

CC(i,k,t)=CC(i,k,t-1)*C_equity(t-1,k)/C_equity(t-2,k);

else

CC(i,k,t)=0;

end

GG=GG+CC(i,k,t-1)-CC(i,k,t);

end

C_equity(t,i)=C_equity(t-1,i)-HH-GG;

else % if the bank is bankrupt after the last time step

for j=1:M

BC(i,j,t)=0;

end

for k=1:N

CC(i,k,t)=0;

end

C_equity(t,i)=0;

end

end
